# Supplementary material
Source: PubMed Central journal article supplement (PMC3992008)
Supplement: Supp_Figure1.pdf [file Supp_Figure1.pdf]

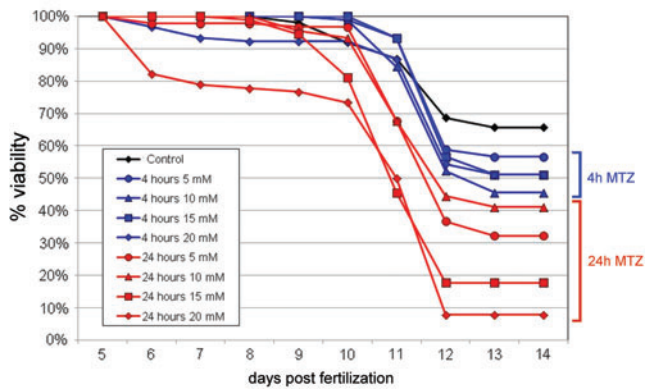

**SUPPLEMENTARY FIG. S1.** Long-term MTZ-induced toxicity/lethality. Wild-type (nontransgenic) larvae were treated at 5 dpf with the indicated concentrations of MTZ for 4 (*blue*) or 24 h (*red*); at 6 dpf, larvae were transferred to a 1 L tank, where they were fed paramecia daily. The number of viable fish was counted each day through 14 dpf; the percent of viable fish for each day is plotted. dpf, days post-fertilization; MTZ, metronidazole.
