# Supplementary material
Source: PubMed Central journal article supplement (PMC3992008)
Supplement: Supp_Figure2.pdf [file Supp_Figure2.pdf]

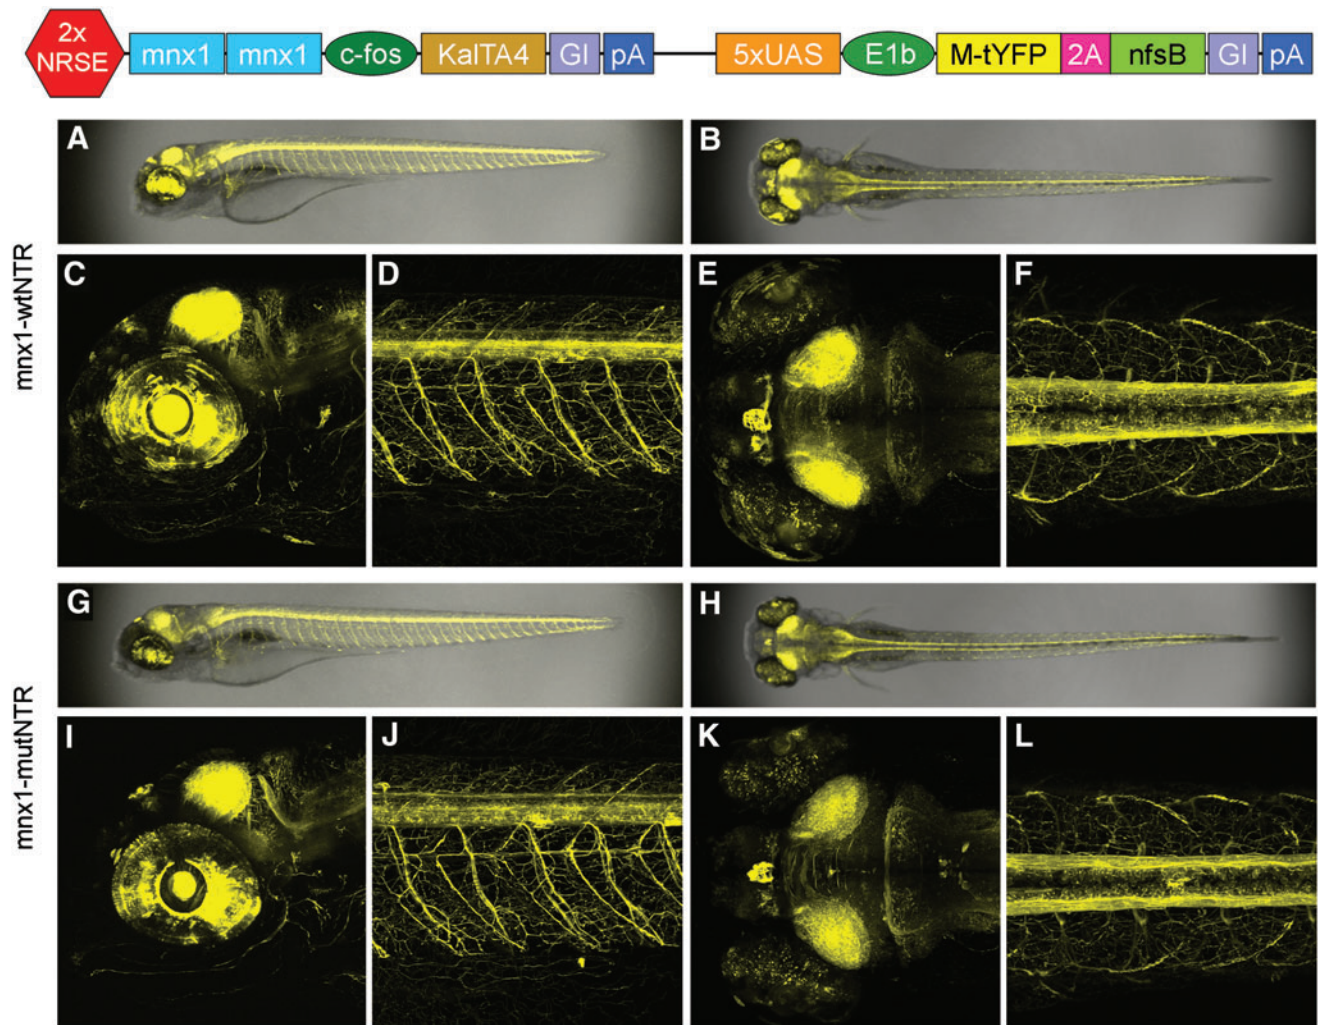

**SUPPLEMENTARY FIG. S2.** Transgenic lines expressing TagYFP in spinal motor neurons, brain, and eyes. A diagram of the *mnx1* enhancer transgene construct (as in Xie *et al.*<sup>31</sup>) is shown at the top; versions with wtNTR and mutNTR (*nfsB*) were used to derive transgenic lines. Representative larvae (at 4 dpf) from complementary transgenic lines coexpressing TagYFP with either wtNTR (A–F, line *mnx1:wtNTR*) or mutNTR (G–L line *mnx1:mutNTR*) in spinal motor neurons, brain, and eyes. (A, C, D, G, I, J) Lateral views, rostral to left: (A, G) total body, (C, I) close-up of head and eye, (D, J) close-up of trunk showing spinal cord and labeled motor neurons. (B, E, F, H, K, L) Dorsal views, rostral to left: (B, H) total body, (E, K) close-up of head and eye, (F, L) close-up of spinal cord and motor neurons. NTR, nitroreductase; mutNTR, mutant NTR; wtNTR, wild-type NTR.
